# Supplementary material for: A non-peptide NIR fluorescent probe for detection of chymotrypsin and its imaging application
Source: Royal Society of Chemistry journal article supplement (doi:10.1039/c9tb00085b), 2019-01-01
Supplement: c9tb00085b1.pdf [file c9tb00085b1.pdf]

## **Electronic Supplementary Information (ESI)**

### **A non-peptide NIR fluorescent probe for detection of chymotrypsin and its imaging application**

Shuai Mu<sup>a</sup>, Yixuan Xu<sup>a</sup>, Yintang Zhang<sup>b</sup>, Xiumei Guo<sup>a</sup>, Jian Li<sup>a</sup>, Yali Wang<sup>c</sup>,

Xiaoyan Liu<sup>a\*</sup>, Haixia Zhang<sup>a</sup>

<sup>a</sup> State Key Laboratory of Applied Organic Chemistry, Key Laboratory of Nonferrous Metals Chemistry and Resources Utilization of Gansu Province and College of Chemistry and Chemical Engineering, Lanzhou University, Lanzhou 730000, China.

<sup>b</sup> Henan Key Laboratory of Biomolecular Recognition and Sensing, College of Chemistry and Chemical Engineering, Shangqiu Normal University, Shangqiu 476000, China,

<sup>c</sup> Key Laboratory of Traditional Chinese medicine quality and standard, Gansu Province, Gansu University of Chinese Medicine, Lanzhou, 730000, China.

### **Contents**

**Section 1. Non-peptide fluorescent probes for detection of chymotrypsin**

**Section 2. Characterization**

**Section 3. Optimization of the recognition group of the probe**

**Section 3. The optical property of CyB and its sensing for Chy**

**Section 4. The mechanism study on CyB for sensing of Chy**

**Section 5. Optimization of conditions**

**Section 6. Enzyme kinetics parameters of CyB**

---

\* Corresponding author Tel: +86-931-8912510; fax: +86-931-8912582;

E-mail: [liuxiaoy@lzu.edu.cn](mailto:liuxiaoy@lzu.edu.cn)

## **Section 7. Cytotoxicity of CyB**

## **Section 8. References**

## Section 1. Non-peptide fluorescent probes for detection of chymotrypsin

Table S1 Comparison of the non-peptide fluorescent probes for detection of chymotrypsin

|                       | $\lambda_{\text{ex}}/\lambda_{\text{em}}(\text{nm})$ | Near-Infrared | pH  | Temperature | Vitro and vivo imaging |
|-----------------------|------------------------------------------------------|---------------|-----|-------------|------------------------|
| Probe(2) <sup>1</sup> | 450/515                                              | No            | 8.0 | 30°C        | No                     |
| NI <sup>2</sup>       | 385/450 and 550                                      | No            | 8.0 | 30°C        | No                     |
| CyB                   | 670/695                                              | Yes           | 7.4 | 37°C        | Yes                    |

## Section 2. Characterization

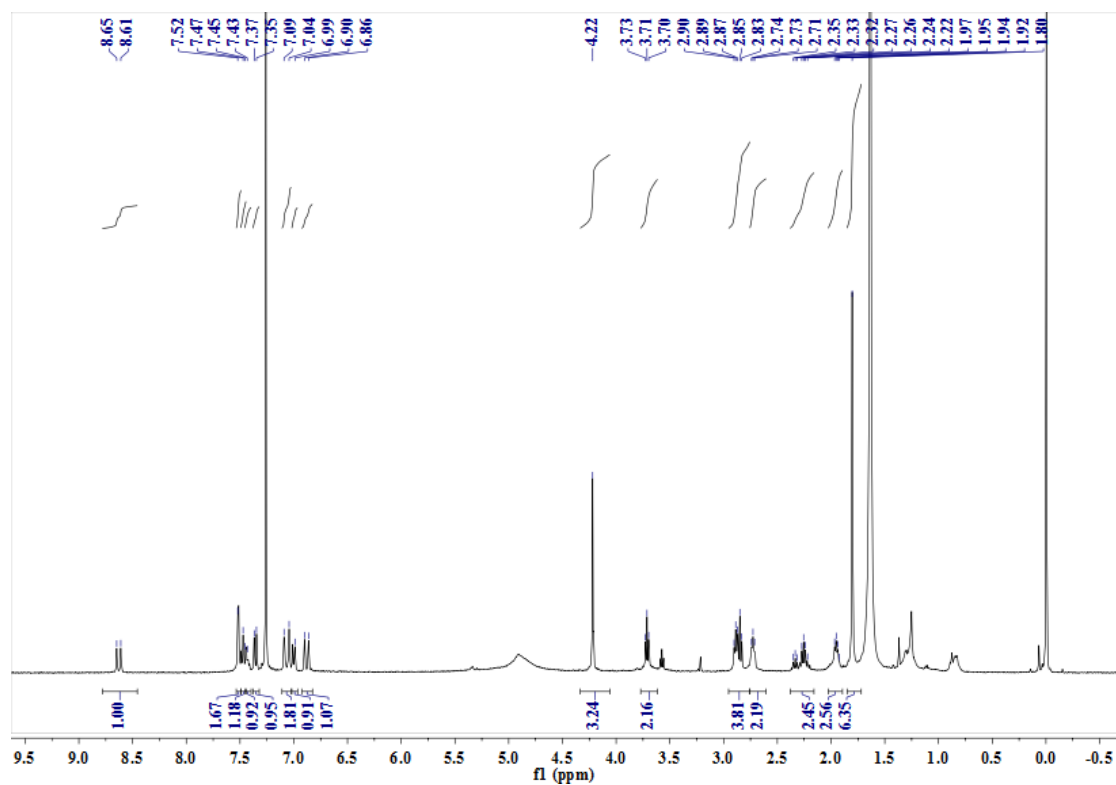

Figure S1. <sup>1</sup>H NMR of CyB.

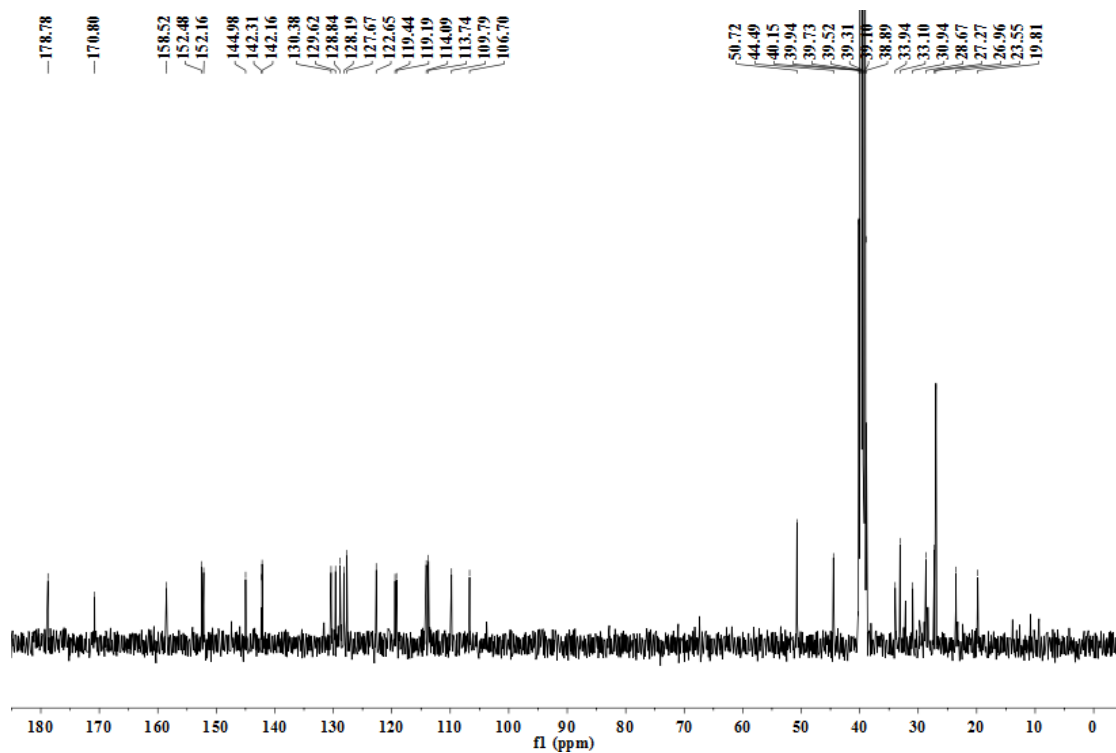

Figure S2. <sup>13</sup>C NMR of CyB.

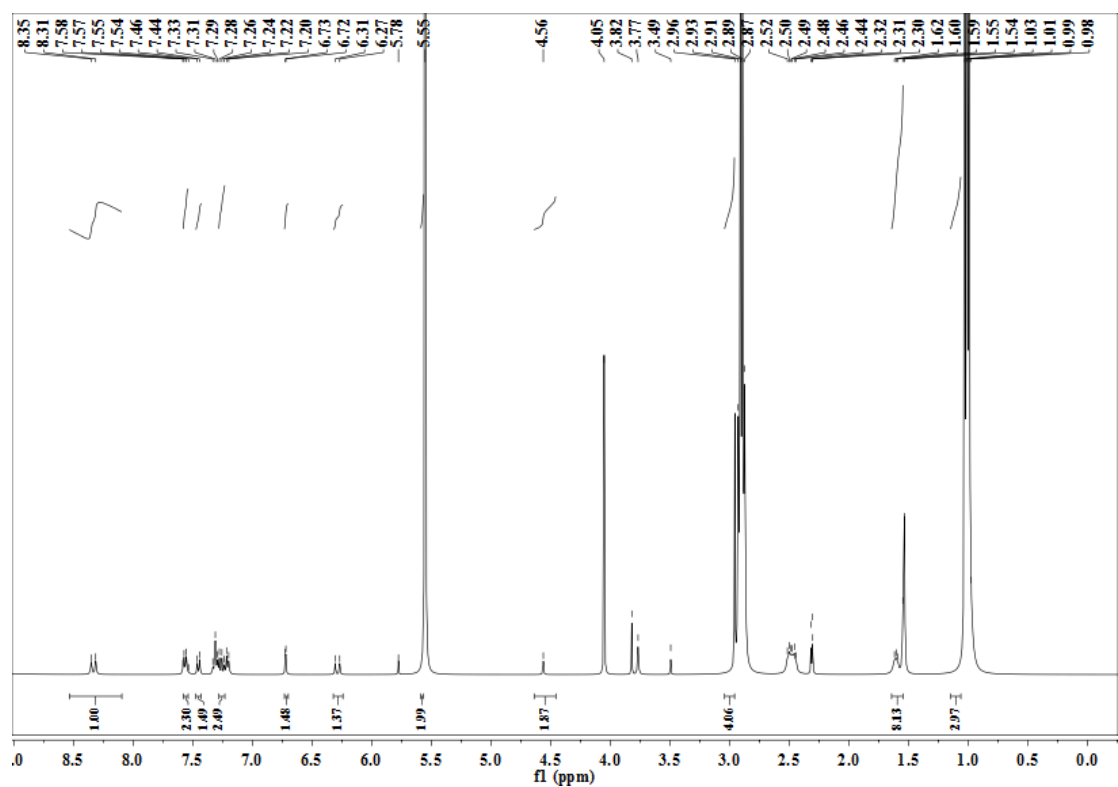

Figure S3. <sup>1</sup>H NMR of CyD

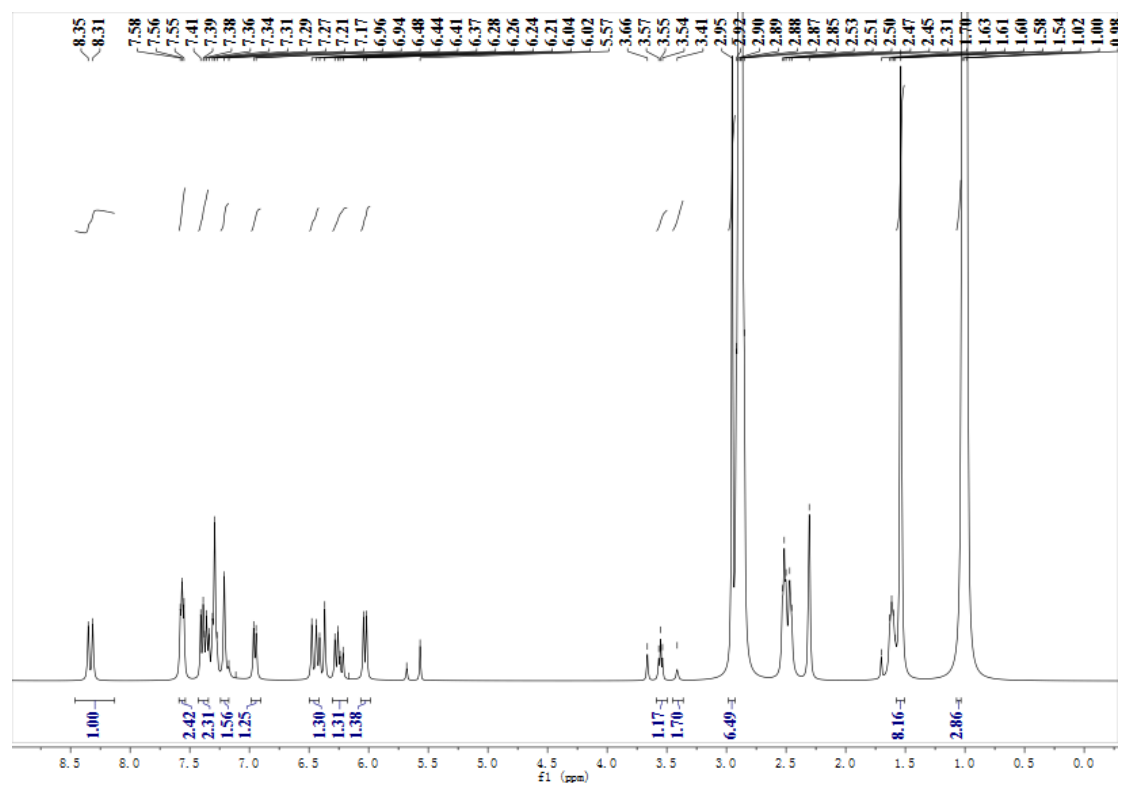

Figure S4. <sup>1</sup>H NMR of CyE

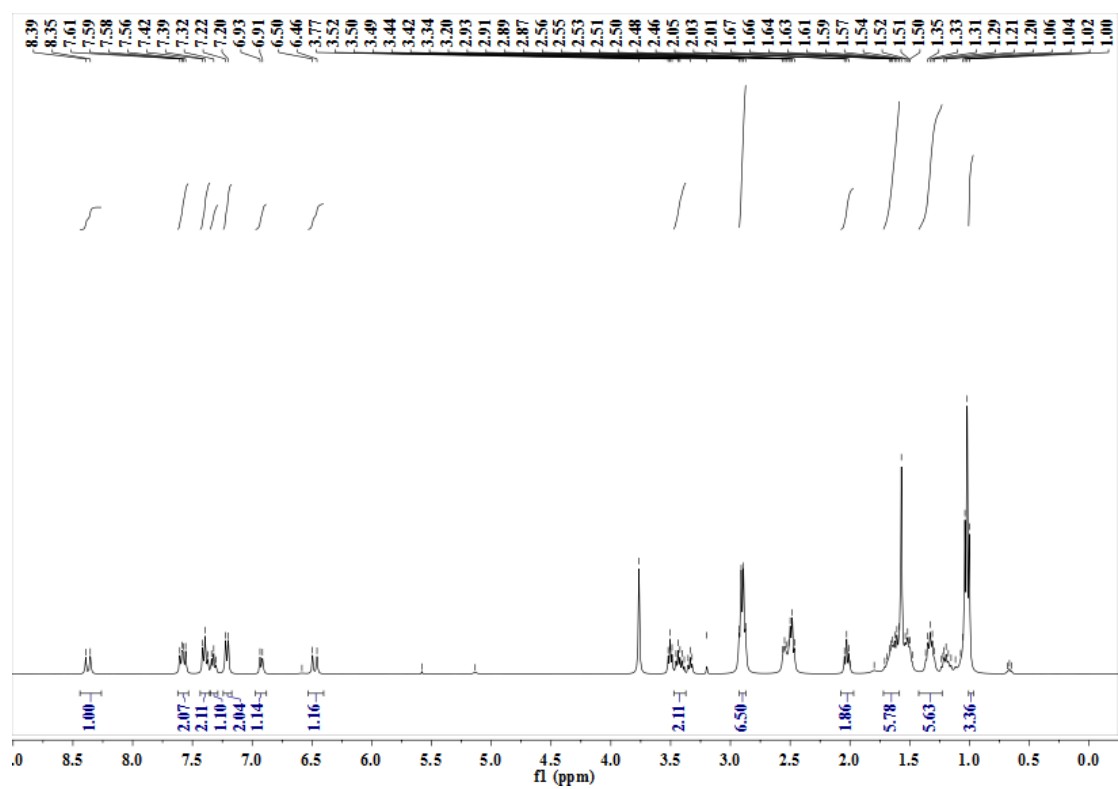

Figure S5.  $^1\text{H}$  NMR of CyF

### Section 3. Optimization of the recognition group of the probe

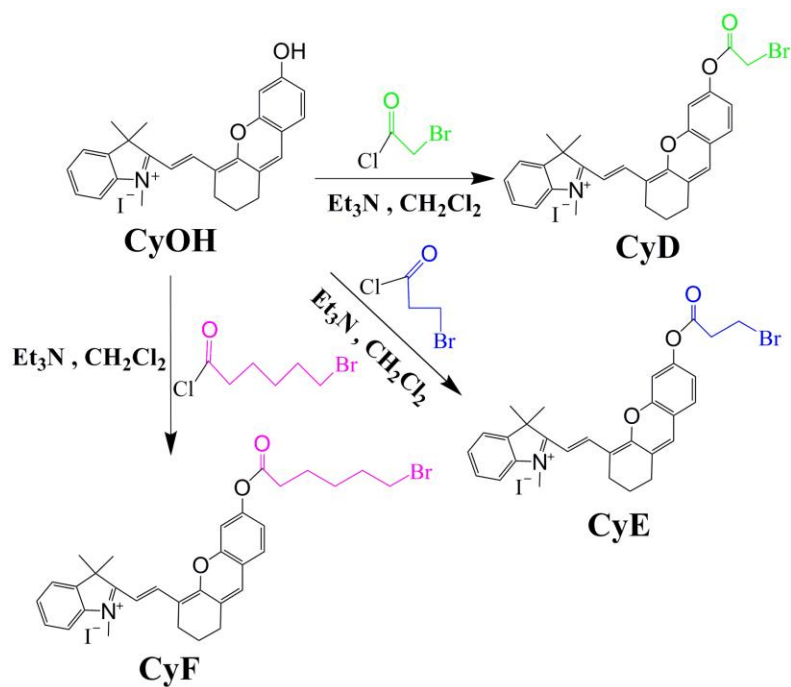

**Figure S6.** Synthesis protocol of CyD, CyE and CyF

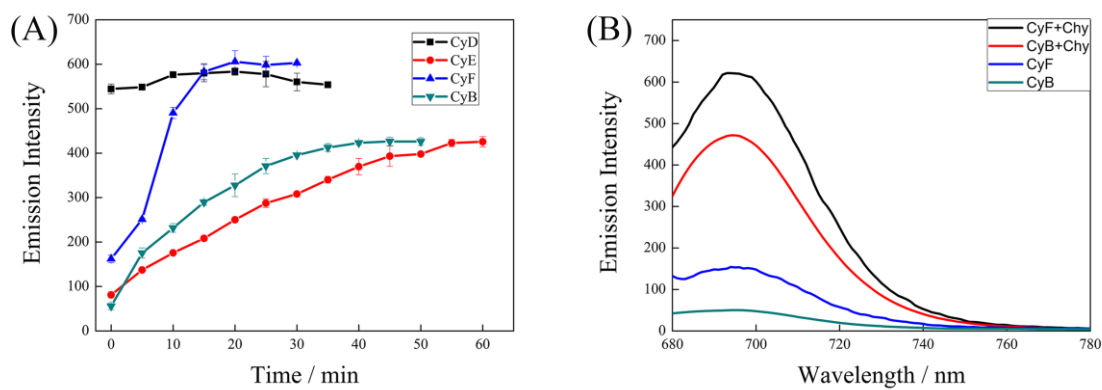

**Figure S7.** (A) Time response of different probes ( $5.0 \mu\text{M}$ ) to chymotrypsin ( $10 \mu\text{g mL}^{-1}$ ).

(B) Fluorescence emission spectra of CyB and CyF ( $5.0 \mu\text{M}$ ) before and after reacted with Chy ( $10 \mu\text{g mL}^{-1}$ ).

## Section 4. The optical property of CyB and its sensing for Chy

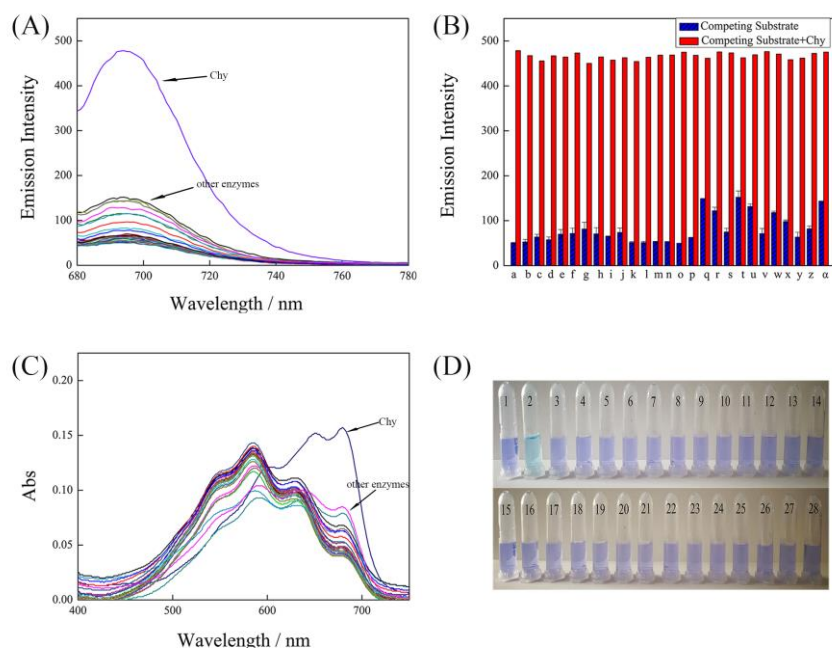

**Figure S8.** Fluorescence emission spectra (A) and fluorescence emission intensity (B) of CyB (5.0  $\mu\text{M}$ ) at 695 nm in the presence of Chy (10  $\mu\text{g mL}^{-1}$ ) and other competing species (1.0 mM) in HEPES buffer solution (pH = 7.4) at 37 °C. (a) blank, (b)  $\text{Na}^+$ , (c)  $\text{Mg}^{2+}$ , (d)  $\text{Zn}^{2+}$ , (e)  $\text{Ca}^{2+}$ , (f)  $\text{Br}^-$ , (g)  $\text{I}^-$ , (h)  $\text{NO}_2^-$ , (i)  $\text{ClO}_4^-$ , (j)  $\text{NO}_3^-$ , (k) Phe, (l) Ala, (m) Arg, (n) Lys, (o) Leu, (p) His, (q) GSH, (r) BSA, (s) Lysozyme, (t) Trypsin, (u) Pepsase, (v) Alkaline protease, (w) Compound proteinase, (x) Tyrosinase, (y) Catalase, (z) Glucose Oxidase, ( $\alpha$ ) Lipase. (C) UV absorption spectrum of CyB (5.0  $\mu\text{M}$ ) in the presence of Chy (10  $\mu\text{g mL}^{-1}$ ) and other competing species (1.0 mM) in HEPES buffer solution (pH = 7.4) at 37 °C. (D) The color change of probe CyB (5.0  $\mu\text{M}$ ) in response to various analytes (1 mM). (1: blank, 2: Chy, 3:  $\text{Na}^+$ , 4:  $\text{Mg}^{2+}$ , 5:  $\text{Zn}^{2+}$ , 6:  $\text{Ca}^{2+}$ , 7:  $\text{Br}^-$ , 8:  $\text{I}^-$ , 9:  $\text{NO}_2^-$ , 10:  $\text{ClO}_4^-$ , 11:  $\text{NO}_3^-$ , 12: Phe, 13: Ala, 14: Arg, 15: Lys, 16: Leu, 17: His, 18: GSH, 19: BSA, 20: Lysozyme, 21: Trypsin, 22: Pepsase, 23: Alkaline protease, 24: Compound proteinase, 25: Tyrosinase, 26: Catalase, 27: Glucose Oxidase, 28: Lipase.)



## Section 5. The mechanism study on CyB for sensing of Chy

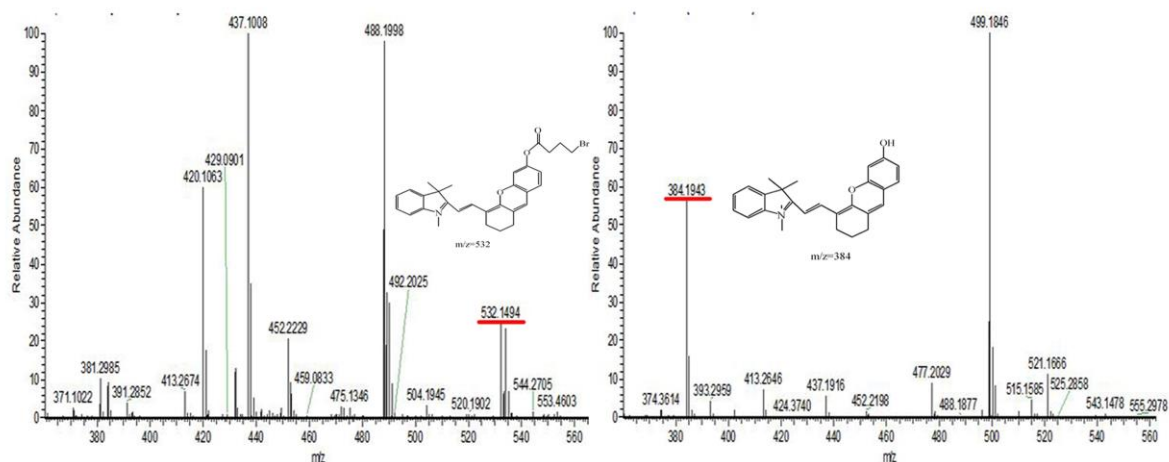

**Figure S9.** HRMS spectrum of CyB (5.0 μM) without (left) and with (right) the addition of Chy

(10 μg mL<sup>-1</sup>) incubated for 35 min in HEPES buffer (100 mM, pH 7.4, 0.5% DMSO) at 37 °C.

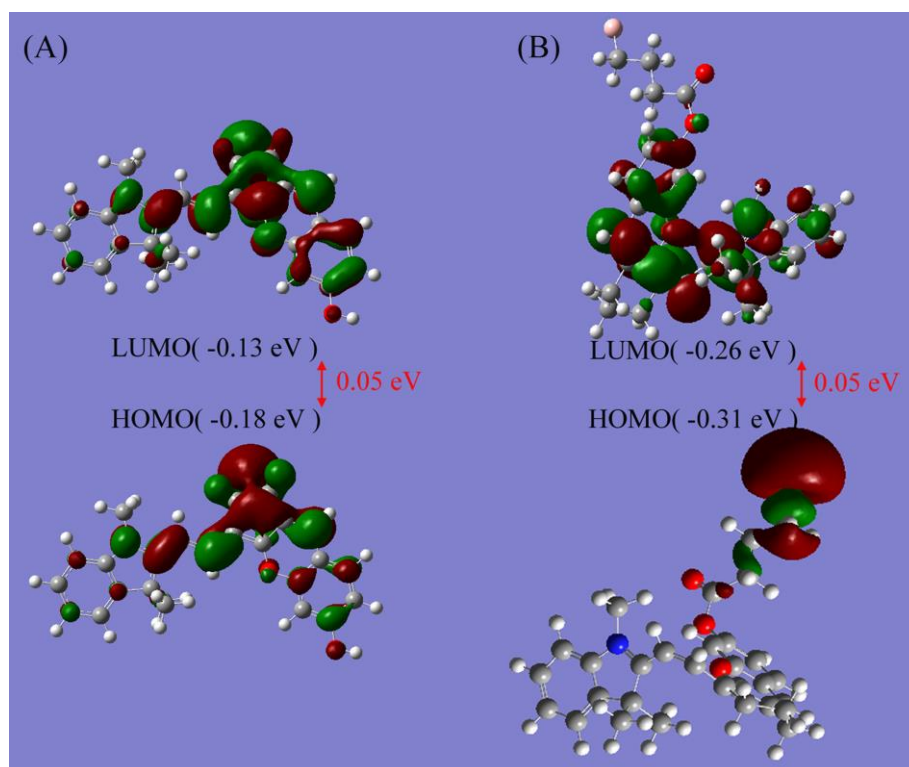

**Figure S10.** (A) CyOH and (B) CyB density functional theory calculation (DFT) frontier orbital

theory (MOs), (B3LYP/6-311G (d, p)/level using Gaussian 09).

## Section 6. Optimization of conditions

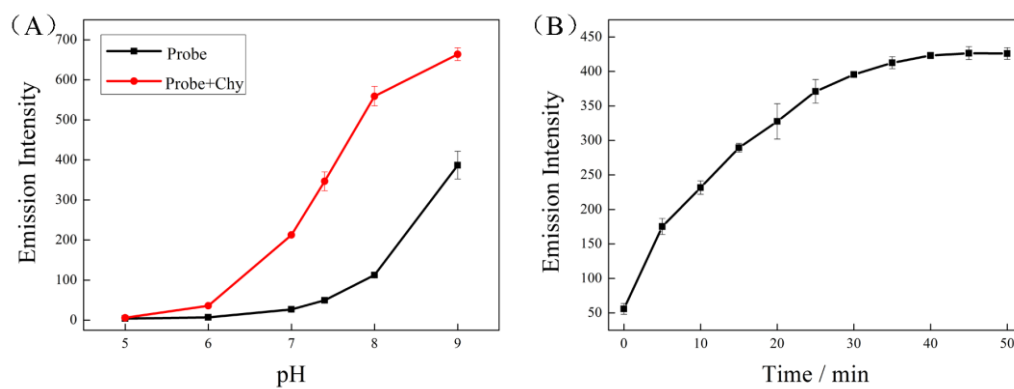

**Figure S11.** The effect of pH (A) and time (B) on the fluorescence response of CyB (5.0  $\mu\text{M}$ ) in the presence and absence of Chy (10  $\mu\text{g mL}^{-1}$ ). The CyB was incubated with Chy for 35 min.

## Section 7. Enzyme kinetics parameters of CyB

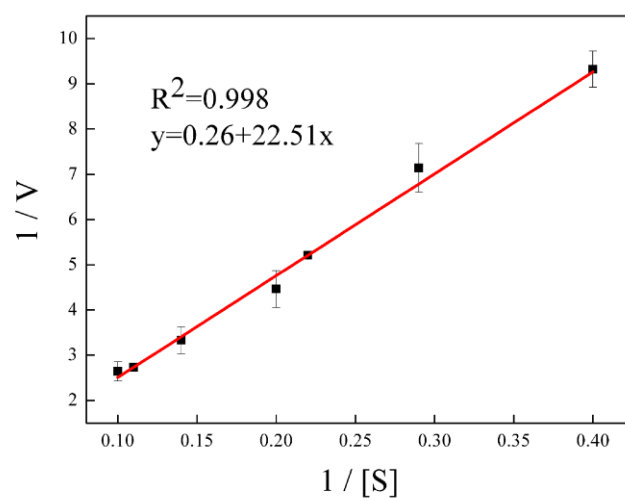

**Figure S12.** Line weaver-Burke plot for the reaction between CyB and Chy ( $10 \mu\text{g mL}^{-1}$ ) in HEPES buffer solution (100 mM, pH 7.4) at  $37^\circ\text{C}$ .

## Section 8. Cytotoxicity of CyB

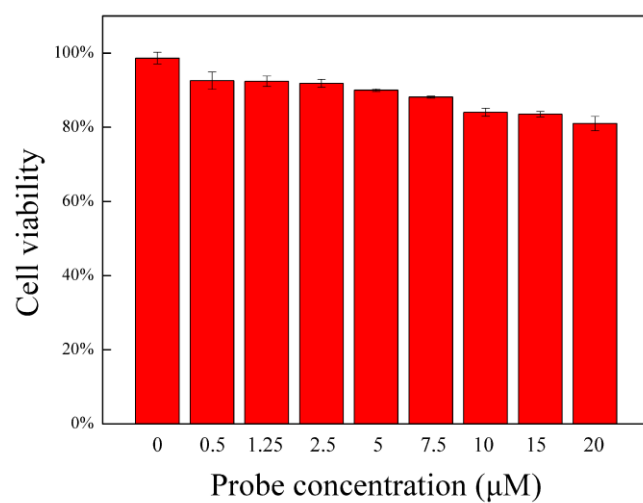

**Figure S13.** MTT assay for estimating cell viability (%) of P815 cells treated with various concentrations of CyB (0-20.0 μM).

## Section 9. References

- 1 L. Wu, S. H. Yang, H. Xiong, J.Q. Yang, J. Guo, W. C. Yang, G. F. Yang, *Anal. Chem*, 2017, **89**, 3687-3693.
- 2 Y. P. Chen, J. Cao, X. X. Jiang, Z. Z. Pan, N. Y. Fu, *Sensors and Actuators B*, 2018, **273**, 204-210.
